# Supplementary material for: Kahweol inhibits lipid accumulation and induces Glucose-uptake through activation of AMP-activated protein kinase (AMPK)
Source: PubMed Central journal article supplement — BMB Rep. 2017 Nov 30;50(11):566–71. doi: 10.5483/BMBRep.2017.50.11.031 (PMC5720470; doi:10.5483/bmbrep.2017.50.11.031), 2017-11-30
Supplement: bmb-50-566_suppl.pdf [file bmb-50-566_suppl.pdf]

## **Supplementary Information**

### **MATERIALS AND METHODS**

#### **Cell culture and adipocyte differentiation assay**

3T3-L1 cells were kindly provided by professor Jae-woo Kim (Yonsei University). 3T3-L1 cells were maintained and differentiated as previously described (1). Briefly, 3T3-L1 cells were grown to post-confluence with DMEM containing 10% bovine serum. On day 0 post-confluence, 3T3-L1 cells were incubated with DMEM containing 10% fetal bovine serum (FBS), insulin (1 µg/ml), isobutylmethylxanthine (520 µM), and dexamethasone (1 µM). After 2 days, media was replaced with DMEM containing 10% FBS and insulin (1 µg/ml). On day 4, media was replaced with DMEM, supplemented with only 10% FBS.

#### **Cell viability assay**

3T3-L1 cells were plated in 12-well plates and incubated until confluence. Then, 3T3-L1 cells were treated with kahweol for 48 h. Cell viability was measured using Ez-Cytox (Daeil Lab), according to the manufacturer's protocol (2, 3). This experiment was performed in triplicate.

#### **Oil Red O staining**

Differentiated 3T3-L1 cells were incubated with 10% formalin for 10 min and washed with distilled water. Then, cells were stained with Oil Red O (ORO) in 60% isopropanol. Stained ORO was eluted with 100% isopropanol and measured at OD<sub>500</sub>.

#### **Western blot analysis**

Cell lysate extractions were prepared with RIPA buffer (1% Triton X-100; 1% sodium deoxycholate; 0.1% sodium dodecyl sulfate; 150 mM NaCl; 50 mM Tris-HCl, pH 7.5; and 2 mM EDTA, pH 8.0) as previously described (1). Primary antibodies (C/EBPα, PPARγ, FABP4, FASN, p-AMPK, AMPK, p-

AKT, AKT, p-JAK2 and JAK2 from Santa Cruz Biotechnology; p-ACC, ACC, p-ERK1/2 and ERK1/2 from Cell Signaling) were used for detection using a FUSION SOLO S (Vilber) detector according to the manufacturer's directions (4-6). The normalization control was anti- $\beta$ -actin (Santa Cruz Biotechnology).

### **RNA isolation and real-time PCR analysis**

RNA was prepared using the RNA-lysis reagent (5 PRIME) as previously described (7). cDNA (1  $\mu$ g) was synthesized from RNA using qPCR RT master mix (TOYOBO). The following primers were used: PPAR $\gamma$ : F\_5'-agggcgatcttgacaggaaa-3' and R\_5'-cgaaactggcacccttgaaa-3'; C/EBP $\alpha$ : F\_5'-gacatcagcgcctacatcga-3' and R\_5'-tcggctgtgctggaagag-3'; FABP4: F\_5'-catcagcgtaaatggggatt-3' and R\_5'-tcgactttccatcccacttc-3'; FASN: F\_5'-tgggttctagccagcagagt-3' and R\_5'-accaccagagaccgttatgc-3';  $\beta$ -actin: F\_5'-ggctgtattcccctccatcg-3' and R\_5'-ccagttgtaacaatgccatgt-3'. Real-time PCR was performed using SYBR Green Master Mix (TOYOBO) with an instrument from Applied Biosystems (8-10).

### **Transfection of small interfering RNA**

3T3-L1 cells were plated in a 6-well plate and incubated for 24 h. 3T3-L1 cells were transfected with mouse AMPK $\alpha$ 1 siRNA at 50 nM (GenePharma) using the Lipofectamine RNAiMAX (Invitrogen), according to the manufacturer's protocol (11, 12). After 24 h, media was replaced with DMEM containing 10% bovine serum. On the next day, differentiation of 3T3-L1 cells was induced in DMEM containing 10% FBS, insulin (1  $\mu$ g/ml), isobutylmethylxanthine (520  $\mu$ M), and dexamethasone (1  $\mu$ M).

### **Glucose uptake assay**

3T3-L1 cells were plated in a 12-well plate and incubated for 4 day. 3T3-L1 cells were incubated with DMEM containing insulin, isobutylmethylxanthine and dexamethasone. After 2 days, media were replaced with DMEM containing kahweol or metformin. After 48 h, glucose uptake was quantitated

using a glucose assay kit (Eton Bioscience), according to the manufacturer's protocol. This experiment was performed in triplicate.

### **Glucose tolerance test (GTT)**

For glucose tolerance tests, wild-type male C57BL/6 mice were fasted overnight. After 15 h, fasting blood glucose levels were measured using a glucometer. Then, glucose solution (1 g/kg) was administered by intraperitoneal injection. Blood glucose levels were measured at 15, 30, 60, 90, and 120 minutes. Animal study was approved by the Yonsei University Health System Institutional Animal Care and Use Committee.

### **Statistical analysis**

We employed unpaired *t*-tests to analyze comparisons between two groups. Statistical analysis was performed using Prism 5. P values < 0.05 were considered to be significant.

### **Reference**

1. Baek, J. H., Kim, S. J., Kang, H. G. et al (2015) Galectin-3 activates PPARgamma and supports white adipose tissue formation and high-fat diet-induced obesity. *Endocrinology* 156, 147-156.
2. Choi, S. W., Song, J. K., Yim, Y. S., Yun, H. G. and Chun, K. H. (2015) Glucose deprivation triggers protein kinase C-dependent beta-catenin proteasomal degradation. *J Biol Chem* 290, 9863-9873.
3. Lee, H. W., Jang, K. S., Choi, H. J., Jo, A., Cheong, J. H. and Chun, K. H. (2014) Celastrol inhibits gastric cancer growth by induction of apoptosis and autophagy. *BMB Rep* 47, 697-702.
4. Kim, S. J., Lee, H. W., Gu Kang, H. et al (2014) Ablation of galectin-3 induces p27(KIP1)-dependent premature senescence without oncogenic stress. *Cell Death Differ* 21, 1769-1779.
5. Kim, S. J., Choi, I. J., Cheong, T. C. et al (2010) Galectin-3 increases gastric cancer cell motility by up-regulating fascin-1 expression. *Gastroenterology* 138, 1035-1045.
6. Kim, S. J., Lee, H. W., Baek, J. H. et al (2016) Activation of nuclear PTEN by inhibition of Notch signaling induces G2/M cell cycle arrest in gastric cancer. *Oncogene* 35, 251-260.
7. Ahn, Y. H., Yi, H., Shin, J. Y. et al (2012) STAT3 silencing enhances the efficacy of the HSVtk

- suicide gene in gastrointestinal cancer therapy. *Clin Exp Metastasis* 29, 359-369.
8. La, S. H., Kim, S. J., Kang, H. G., Lee, H. W. and Chun, K. H. (2016) Ablation of human telomerase reverse transcriptase (hTERT) induces cellular senescence in gastric cancer through a galectin-3 dependent mechanism. *Oncotarget*.
  9. Cho, Y., Lee, H. W., Kang, H. G., Kim, H. Y., Kim, S. J. and Chun, K. H. (2015) Cleaved CD44 intracellular domain supports activation of stemness factors and promotes tumorigenesis of breast cancer. *Oncotarget* 6, 8709-8721.
  10. Kim, S. J., Wang, Y. G., Lee, H. W. et al (2014) Up-regulation of neogenin-1 increases cell proliferation and motility in gastric cancer. *Oncotarget* 5, 3386-3398.
  11. Wang, Y. G., Kim, S. J., Baek, J. H., Lee, H. W., Jeong, S. Y. and Chun, K. H. (2012) Galectin-3 increases the motility of mouse melanoma cells by regulating matrix metalloproteinase-1 expression. *Exp Mol Med* 44, 387-393.
  12. Kim, S. J., Shin, J. Y., Lee, K. D. et al (2012) MicroRNA let-7a suppresses breast cancer cell migration and invasion through downregulation of C-C chemokine receptor type 7. *Breast Cancer Res* 14, R14.
